# Supplementary material
Source: HighWire-hosted journal article supplement (https://www.rsfjournal.org/content/suppl/2019/01/24/2.5.83)
Supplement: Morgan_Jung_Supplementary_Appendix.pdf [file Morgan_Jung_Supplementary_Appendix.pdf]

**SUPPLEMENTARY APPENDIX**

**For**

**Still No Effect of Resources, Even in the New Gilded Age?**

Stephen L. Morgan  
Johns Hopkins University

Sol Bee Jung  
Johns Hopkins University

**Table S1 (for Comparison with Table 1). Racial Composition of ELS High Schools, Reported for the Common Core of Data, by ELS Respondents' Self-Identified Race-Ethnicity and Immigrant Generational Status**

|                                                                                                                                                                                               | Percent White | Percent Black | Percent Hispanic | N     |
|-----------------------------------------------------------------------------------------------------------------------------------------------------------------------------------------------|---------------|---------------|------------------|-------|
| 1. Mexican, Mexican American, or Chicano, 1 <sup>st</sup> generation                                                                                                                          | 32.5%         | 11.2%         | 50.0%            | 108   |
| 2. Mexican, Mexican American, or Chicano, 1.5 <sup>th</sup> generation                                                                                                                        | 27.7%         | 12.3%         | 53.4%            | 75    |
| 3. Mexican, Mexican American, or Chicano, 2 <sup>nd</sup> generation                                                                                                                          | 28.6%         | 8.3%          | 58.0%            | 232   |
| 4. Mexican, Mexican American, or Chicano, 3 <sup>rd</sup> + generation                                                                                                                        | 44.2%         | 6.8%          | 43.5%            | 314   |
| 5. Puerto Rican, Cuban, or Dominican, 1 <sup>st</sup> or 1.5 <sup>th</sup> generation                                                                                                         | 22.6%         | 22.5%         | 51.5%            | 36    |
| 6. Puerto Rican, Cuban, or Dominican, 2 <sup>nd</sup> generation                                                                                                                              | 33.4%         | 23.0%         | 37.9%            | 58    |
| 7. South and Central American, 1 <sup>st</sup> or 1.5 <sup>th</sup> generation                                                                                                                | 37.9%         | 19.1%         | 36.4%            | 70    |
| 8. South and Central American, 2 <sup>nd</sup> generation                                                                                                                                     | 33.4%         | 20.0%         | 38.6%            | 40    |
| 9. Hispanic ethnicity of any type, Generational status missing but Spanish is the student's native language                                                                                   | 29.8%         | 10.6%         | 54.0%            | 49    |
| 10. Hispanic ethnicity of any type, Generational status missing but Spanish is not the student's native language                                                                              | 40.2%         | 14.5%         | 36.6%            | 68    |
| 11. Hispanic ethnicity other than Mexican, Mexican American, or Chicano, 3 <sup>rd</sup> + generation                                                                                         | 56.4%         | 20.4%         | 18.3%            | 109   |
| 12. Asian or NHOPI non-Hispanic, 1 <sup>st</sup> or 1.5 <sup>th</sup> generation                                                                                                              | 49.2%         | 15.9%         | 17.5%            | 348   |
| 13. Asian or NHOPI non-Hispanic, 2 <sup>nd</sup> generation or Generational status missing but English is not the student's native language                                                   | 46.8%         | 14.3%         | 17.9%            | 466   |
| 14. Asian or NHOPI non-Hispanic, 3 <sup>rd</sup> + generation or Generational status missing but English is the student's native language                                                     | 63.4%         | 9.8%          | 9.8%             | 172   |
| 15. Black or African American non-Hispanic, 1 <sup>st</sup> , 1.5 <sup>th</sup> , 2 <sup>nd</sup> generation, or Generational status missing but English is not the student's native language | 38.9%         | 37.6%         | 17.4%            | 104   |
| 16. Black or African American non-Hispanic, 3 <sup>rd</sup> + generation or Generational status missing but English is the student's native language                                          | 38.4%         | 48.1%         | 9.7%             | 1112  |
| 17. American Indian or Alaskan Native non-Hispanic, All generations                                                                                                                           | 73.4%         | 7.5%          | 6.1%             | 156   |
| 18. White non-Hispanic, 1 <sup>st</sup> , 1.5 <sup>th</sup> , or 2 <sup>nd</sup> generation or Generational status missing but English is not the student's native language                   | 71.0%         | 12.2%         | 9.2%             | 178   |
| 19. White non-Hispanic, 3 <sup>rd</sup> + generation or Generational status missing but English is the student's native language                                                              | 81.0%         | 9.2%          | 6.2%             | 4,298 |
| 20. Missing race, all generations                                                                                                                                                             | 54.8%         | 24.7%         | 15.1%            | 44    |

Source: ELS 2002-2012 and Common Core of Data, 2001-2004.

Notes: Data are weighted by the panel weight constructed by the data distributors (f2pnlwt) that adjusts for base-year nonparticipation and subsequent attrition, multiplied by an adjustment weight that we created to account for missing data on educational attainment.

**Table S2 (for Comparison with Table 3). Staffing and Funding Profile by Race-Ethnicity and Immigrant Generational Status**

|                                                                                                                                                                                               | Pupil-to-Teacher Ratio | Percent of Teachers MA or Above | Percent of Total Funding from Federal Sources | Percent Free or Reduced-Price Lunch | N    |
|-----------------------------------------------------------------------------------------------------------------------------------------------------------------------------------------------|------------------------|---------------------------------|-----------------------------------------------|-------------------------------------|------|
| 1. Mexican, Mexican American, or Chicano, 1 <sup>st</sup> generation                                                                                                                          | 19.7                   | 39.7%                           | 9.2%                                          | 44.1%                               | 108  |
| 2. Mexican, Mexican American, or Chicano, 1.5 <sup>th</sup> generation                                                                                                                        | 21.5                   | 33.4%                           | 9.5%                                          | 43.0%                               | 75   |
| 3. Mexican, Mexican American, or Chicano, 2 <sup>nd</sup> generation                                                                                                                          | 20.9                   | 33.7%                           | 9.3%                                          | 47.2%                               | 232  |
| 4. Mexican, Mexican American, or Chicano, 3 <sup>rd</sup> + generation                                                                                                                        | 18.5                   | 36.7%                           | 9.2%                                          | 38.0%                               | 314  |
| 5. Puerto Rican, Cuban, or Dominican, 1 <sup>st</sup> or 1.5 <sup>th</sup> generation                                                                                                         | 19.0                   | 51.0%                           | 9.2%                                          | 54.3%                               | 36   |
| 6. Puerto Rican, Cuban, or Dominican, 2 <sup>nd</sup> generation                                                                                                                              | 17.3                   | 61.2%                           | 7.9%                                          | 41.6%                               | 56   |
| 7. South and Central American, 1 <sup>st</sup> or 1.5 <sup>th</sup> generation                                                                                                                | 18.7                   | 46.1%                           | 8.3%                                          | 37.8%                               | 68   |
| 8. South and Central American, 2 <sup>nd</sup> generation                                                                                                                                     | 19.1                   | 45.4%                           | 7.9%                                          | 41.5%                               | 40   |
| 9. Hispanic ethnicity of any type, Generational status missing but Spanish is the student's native language                                                                                   | 20.4                   | 36.0%                           | 8.6%                                          | 44.5%                               | 49   |
| 10. Hispanic ethnicity of any type, Generational status missing but Spanish is not the student's native language                                                                              | 17.8                   | 45.2%                           | 8.5%                                          | 41.1%                               | 67   |
| 11. Hispanic ethnicity other than Mexican, Mexican American, or Chicano, 3 <sup>rd</sup> + generation                                                                                         | 17.9                   | 51.1%                           | 7.3%                                          | 30.9%                               | 108  |
| 12. Asian or NHOPI non-Hispanic, 1 <sup>st</sup> or 1.5 <sup>th</sup> generation                                                                                                              | 18.7                   | 49.9%                           | 7.3%                                          | 30.7%                               | 348  |
| 13. Asian or NHOPI non-Hispanic, 2 <sup>nd</sup> generation or Generational status missing but English is not the student's native language                                                   | 18.8                   | 48.9%                           | 7.3%                                          | 27.6%                               | 465  |
| 14. Asian or NHOPI non-Hispanic, 3 <sup>rd</sup> + generation or Generational status missing but English is the student's native language                                                     | 17.0                   | 47.6%                           | 6.9%                                          | 26.4%                               | 171  |
| 15. Black or African American non-Hispanic, 1 <sup>st</sup> , 1.5 <sup>th</sup> , 2 <sup>nd</sup> generation, or Generational status missing but English is not the student's native language | 17.5                   | 50.9%                           | 7.6%                                          | 34.7%                               | 104  |
| 16. Black or African American non-Hispanic, 3 <sup>rd</sup> + generation or Generational status missing but English is the student's native language                                          | 16.7                   | 46.7%                           | 10.5%                                         | 42.1%                               | 1112 |
| 17. American Indian or Alaskan Native non-Hispanic, All generations                                                                                                                           | 16.7                   | 40.0%                           | 11.2%                                         | 27.8%                               | 156  |
| 18. White non-Hispanic, 1 <sup>st</sup> , 1.5 <sup>th</sup> , or 2 <sup>nd</sup> generation or Generational status missing but English is not the student's native language                   | 17.4                   | 49.5%                           | 5.8%                                          | 21.2%                               | 177  |
| 19. White non-Hispanic, 3 <sup>rd</sup> + generation or Generational status missing but English is the student's native language                                                              | 16.3                   | 47.5%                           | 6.7%                                          | 22.2%                               | 4297 |
| 20. Missing race, all generations                                                                                                                                                             | 17.4                   | 50.5%                           | 8.1%                                          | 32.0%                               | 44   |

Source: ELS 2002-2012 and Common Core of Data, 2001-2004.

Notes: Data are weighted by the panel weight constructed by the data distributors (f2pnlwt) that adjusts for base-year nonparticipation and subsequent attrition, multiplied by an adjustment weight that we created to account for missing data on educational attainment.

**Table S3 (for Comparison with Table 4). Factor-Score Scales of Poor Conditions and Maintenance of Facilities by Race-Ethnicity and Immigrant Generational Status**

|                                                                                                                                                                                               | Classrooms | Hallways | Bathrooms | Outside School Area | N    |
|-----------------------------------------------------------------------------------------------------------------------------------------------------------------------------------------------|------------|----------|-----------|---------------------|------|
| 1. Mexican, Mexican American, or Chicano, 1 <sup>st</sup> generation                                                                                                                          | 0.03       | 0.24     | 0.05      | 0.45                | 87   |
| 2. Mexican, Mexican American, or Chicano, 1.5 <sup>th</sup> generation                                                                                                                        | 0.29       | 0.65     | 0.39      | 0.17                | 60   |
| 3. Mexican, Mexican American, or Chicano, 2 <sup>nd</sup> generation                                                                                                                          | 0.22       | 0.29     | 0.27      | 0.21                | 179  |
| 4. Mexican, Mexican American, or Chicano, 3 <sup>rd</sup> + generation                                                                                                                        | 0.05       | 0.04     | -0.11     | -0.02               | 252  |
| 5. Puerto Rican, Cuban, or Dominican, 1 <sup>st</sup> or 1.5 <sup>th</sup> generation                                                                                                         | 1.62       | 0.38     | 1.21      | 0.18                | 27   |
| 6. Puerto Rican, Cuban, or Dominican, 2 <sup>nd</sup> generation                                                                                                                              | 0.19       | 0.52     | 0.16      | 0.75                | 38   |
| 7. South and Central American, 1 <sup>st</sup> or 1.5 <sup>th</sup> generation                                                                                                                | 0.11       | 0.02     | 0.31      | 0.32                | 55   |
| 8. South and Central American, 2 <sup>nd</sup> generation                                                                                                                                     | 0.27       | 0.39     | 0.48      | 0.83                | 32   |
| 9. Hispanic ethnicity of any type, Generational status missing but Spanish is the student's native language                                                                                   | 0.63       | 0.60     | 0.71      | 0.85                | 38   |
| 10. Hispanic ethnicity of any type, Generational status missing but Spanish is not the student's native language                                                                              | 0.11       | 0.15     | 0.22      | 0.16                | 56   |
| 11. Hispanic ethnicity other than Mexican, Mexican American, or Chicano, 3 <sup>rd</sup> + generation                                                                                         | -0.02      | 0.23     | 0.14      | 0.39                | 85   |
| 12. Asian or NHOPI non-Hispanic, 1 <sup>st</sup> or 1.5 <sup>th</sup> generation                                                                                                              | 0.14       | 0.11     | 0.18      | 0.28                | 280  |
| 13. Asian or NHOPI non-Hispanic, 2 <sup>nd</sup> generation or Generational status missing but English is not the student's native language                                                   | 0.09       | -0.07    | 0.03      | 0.01                | 378  |
| 14. Asian or NHOPI non-Hispanic, 3 <sup>rd</sup> + generation or Generational status missing but English is the student's native language                                                     | 0.03       | -0.03    | 0.07      | -0.13               | 154  |
| 15. Black or African American non-Hispanic, 1 <sup>st</sup> , 1.5 <sup>th</sup> , 2 <sup>nd</sup> generation, or Generational status missing but English is not the student's native language | 0.27       | 0.09     | 0.44      | 0.31                | 80   |
| 16. Black or African American non-Hispanic, 3 <sup>rd</sup> + generation or Generational status missing but English is the student's native language                                          | 0.21       | 0.20     | 0.35      | 0.41                | 892  |
| 17. American Indian or Alaskan Native non-Hispanic, All generations                                                                                                                           | -0.17      | -0.01    | -0.12     | -0.14               | 128  |
| 18. White non-Hispanic, 1 <sup>st</sup> , 1.5 <sup>th</sup> , or 2 <sup>nd</sup> generation or Generational status missing but English is not the student's native language                   | -0.15      | -0.24    | 0.06      | -0.14               | 126  |
| 19. White non-Hispanic, 3 <sup>rd</sup> + generation or Generational status missing but English is the student's native language                                                              | -0.11      | -0.11    | -0.16     | -0.18               | 3346 |
| 20. Missing race, all generations                                                                                                                                                             | -0.15      | -0.18    | 0.25      | -0.08               | 40   |

Source: ELS 2002-2012 and Common Core of Data, 2001-2004.

Notes: Data are weighted by the panel weight constructed by the data distributors (f2pnlwt) that adjusts for base-year nonparticipation and subsequent attrition, multiplied by an adjustment weight that we created to account for missing data on educational attainment.

**Table S4 (for Comparison with Table 5). Per-Pupil Expenditures by Race-Ethnicity and Immigrant Generational Status**

|                                                                                                                                                                                               | Per Pupil Total Expenditures | Per Pupil Cost-Adjusted Total Expenditures | Per Pupil Total Expenditures | Per Pupil Cost-Adjusted Total Expenditures | N     |
|-----------------------------------------------------------------------------------------------------------------------------------------------------------------------------------------------|------------------------------|--------------------------------------------|------------------------------|--------------------------------------------|-------|
| 1. Mexican, Mexican American, or Chicano, 1 <sup>st</sup> generation                                                                                                                          | 8,665                        | 8,529                                      | 4,313                        | 4,249                                      | 108   |
| 2. Mexican, Mexican American, or Chicano, 1.5 <sup>th</sup> generation                                                                                                                        | 8,393                        | 8,493                                      | 4,261                        | 4,302                                      | 75    |
| 3. Mexican, Mexican American, or Chicano, 2 <sup>nd</sup> generation                                                                                                                          | 8,489                        | 8,490                                      | 4,326                        | 4,336                                      | 232   |
| 4. Mexican, Mexican American, or Chicano, 3 <sup>rd</sup> + generation                                                                                                                        | 8,348                        | 8,548                                      | 4,145                        | 4,263                                      | 314   |
| 5. Puerto Rican, Cuban, or Dominican, 1 <sup>st</sup> or 1.5 <sup>th</sup> generation                                                                                                         | 11,160                       | 10,815                                     | 6,343                        | 6,150                                      | 36    |
| 6. Puerto Rican, Cuban, or Dominican, 2 <sup>nd</sup> generation                                                                                                                              | 11,749                       | 11,295                                     | 6,714                        | 6,448                                      | 58    |
| 7. South and Central American, 1 <sup>st</sup> or 1.5 <sup>th</sup> generation                                                                                                                | 10,008                       | 9,248                                      | 5,212                        | 4,810                                      | 70    |
| 8. South and Central American, 2 <sup>nd</sup> generation                                                                                                                                     | 10,167                       | 9,441                                      | 5,553                        | 5,155                                      | 40    |
| 9. Hispanic ethnicity of any type, Generational status missing but Spanish is the student's native language                                                                                   | 9,451                        | 9,151                                      | 4,783                        | 4,639                                      | 49    |
| 10. Hispanic ethnicity of any type, Generational status missing but Spanish is not the student's native language                                                                              | 9,522                        | 9,198                                      | 4,880                        | 4,725                                      | 68    |
| 11. Hispanic ethnicity other than Mexican, Mexican American, or Chicano, 3 <sup>rd</sup> + generation                                                                                         | 10,241                       | 9,772                                      | 5,403                        | 5,161                                      | 109   |
| 12. Asian or NHOPI non-Hispanic, 1 <sup>st</sup> or 1.5 <sup>th</sup> generation                                                                                                              | 10,042                       | 9,575                                      | 5,307                        | 5,067                                      | 348   |
| 13. Asian or NHOPI non-Hispanic, 2 <sup>nd</sup> generation or Generational status missing but English is not the student's native language                                                   | 9,760                        | 9,154                                      | 5,057                        | 4,757                                      | 466   |
| 14. Asian or NHOPI non-Hispanic, 3 <sup>rd</sup> + generation or Generational status missing but English is the student's native language                                                     | 9,850                        | 9,547                                      | 5,063                        | 4,923                                      | 172   |
| 15. Black or African American non-Hispanic, 1 <sup>st</sup> , 1.5 <sup>th</sup> , 2 <sup>nd</sup> generation, or Generational status missing but English is not the student's native language | 10,793                       | 10,061                                     | 5,676                        | 5,302                                      | 104   |
| 16. Black or African American non-Hispanic, 3 <sup>rd</sup> + generation or Generational status missing but English is the student's native language                                          | 9,152                        | 8,976                                      | 4,770                        | 4,682                                      | 1112  |
| 17. American Indian or Alaskan Native non-Hispanic, All generations                                                                                                                           | 8,951                        | 9,173                                      | 4,559                        | 4,688                                      | 156   |
| 18. White non-Hispanic, 1 <sup>st</sup> , 1.5 <sup>th</sup> , or 2 <sup>nd</sup> generation or Generational status missing but English is not the student's native language                   | 9,955                        | 9,538                                      | 5,335                        | 5,118                                      | 178   |
| 19. White non-Hispanic, 3 <sup>rd</sup> + generation or Generational status missing but English is the student's native language                                                              | 9,014                        | 9,138                                      | 4,679                        | 4,753                                      | 4,298 |
| 20. Missing race, all generations                                                                                                                                                             | 9,250                        | 8,979                                      | 4,694                        | 4,570                                      | 44    |

**Table S5 (for Comparison with Table 6). Proportion of Variance Explained, Adjusted R-Squared, for Separate Naive Linear Regression and Linear Probability Models**

|                                                                                                                          | Reading Test<br>in 2002<br>(10 <sup>th</sup> Grade) | Math Test<br>in 2002<br>(10 <sup>th</sup> Grade) | Math Test<br>in 2004<br>(typically<br>12 <sup>th</sup> Grade) | On-Time<br>High School<br>Graduation in<br>2004 | Any Post-<br>Secondary<br>Education by<br>2012 | Bachelor's<br>Degree by<br>2012 |
|--------------------------------------------------------------------------------------------------------------------------|-----------------------------------------------------|--------------------------------------------------|---------------------------------------------------------------|-------------------------------------------------|------------------------------------------------|---------------------------------|
| <u>Individual</u>                                                                                                        |                                                     |                                                  |                                                               |                                                 |                                                |                                 |
| Race-ethnicity and immigrant generation (8 dummies)                                                                      | 0.135                                               | 0.152                                            | 0.146                                                         | 0.027                                           | 0.013                                          | 0.046                           |
| Family background (5 variables for socioeconomic status and one variable for living only with mother or female guardian) | 0.174                                               | 0.184                                            | 0.210                                                         | 0.050                                           | 0.071                                          | 0.137                           |
| <u>Individual and School</u>                                                                                             |                                                     |                                                  |                                                               |                                                 |                                                |                                 |
| Region and Urbanicity (11 dummies)                                                                                       | 0.035                                               | 0.039                                            | 0.034                                                         | 0.015                                           | 0.008                                          | 0.018                           |
| Racial composition (two variables for percent Black and percent Hispanic)                                                | 0.084                                               | 0.095                                            | 0.086                                                         | 0.016                                           | 0.004                                          | 0.021                           |
| Percent free and reduced price lunch                                                                                     | 0.096                                               | 0.114                                            | 0.107                                                         | 0.021                                           | 0.015                                          | 0.045                           |
| Percent of total funding from federal sources                                                                            | 0.042                                               | 0.058                                            | 0.054                                                         | 0.009                                           | 0.009                                          | 0.025                           |
| <u>School</u>                                                                                                            |                                                     |                                                  |                                                               |                                                 |                                                |                                 |
| Teaching corps (2 variables for pupil-to-teacher ratio and percent of teachers with master's degrees or higher)          | 0.013                                               | 0.010                                            | 0.011                                                         | 0.005                                           | 0.003                                          | 0.005                           |
| Poor conditions scales (4 variables)                                                                                     | 0.021                                               | 0.019                                            | 0.015                                                         | 0.003                                           | 0.001                                          | 0.007                           |
| School principal scale for learning "hindered by" poor conditions and facilities                                         | 0.006                                               | 0.009                                            | 0.008                                                         | 0.004                                           | 0.001                                          | 0.003                           |
| <u>District</u>                                                                                                          |                                                     |                                                  |                                                               |                                                 |                                                |                                 |
| Total expenditures, per pupil                                                                                            | 0.002                                               | 0.002                                            | 0.002                                                         | 0.001                                           | 0.005                                          | 0.008                           |
| Total expenditures, per pupil and cost-adjusted                                                                          | 0.001                                               | 0.001                                            | 0.001                                                         | 0.001                                           | 0.002                                          | 0.003                           |
| Instructional expenditures, per pupil                                                                                    | 0.001                                               | 0.001                                            | 0.002                                                         | 0.001                                           | 0.004                                          | 0.008                           |
| Instructional expenditures, per pupil and cost-adjusted                                                                  | 0.001                                               | 0.001                                            | 0.001                                                         | < 0.001                                         | 0.001                                          | 0.003                           |
| Salaries for instructional staff, per pupil                                                                              | 0.003                                               | 0.004                                            | 0.005                                                         | 0.001                                           | 0.005                                          | 0.011                           |
| Salaries for instructional staff, per pupil and cost-adjusted                                                            | 0.002                                               | 0.002                                            | 0.002                                                         | 0.001                                           | 0.002                                          | 0.005                           |

Source: ELS 2002-2012 and Common Core of Data, 2001-2004.

Notes: Data are weighted by the panel weight constructed by the data distributors (f2pnlwt) that adjusts for base-year nonparticipation and subsequent attrition, multiplied by an adjustment weight that we created to account for missing data on educational attainment. Models for on-time high school graduation, any postsecondary education, and bachelor's degrees are linear probability models. Proportion of variance explained is estimated as adjusted R-squared values. Most models are estimated for 8,037 students, but others were estimated for subsets of this full sample because of missing data on the predictor variables: percent free and reduced price lunch (8,026), teaching corps (6,898), learning "hindered by" (6,555), and scales for poor conditions (6,163).

**Table S6 (for Comparison with Tables 7 and 8). Metric Coefficients for Expenditure Variables for Separate Between-School Models of 10<sup>th</sup> Grade Reading Test Scores, With and Without Adjustments for Family Background, Region, and Urbanicity**

|                                                               | Unadjusted              |           | With Adjustments for Family Background, Region, and Urbanicity |           |
|---------------------------------------------------------------|-------------------------|-----------|----------------------------------------------------------------|-----------|
|                                                               | Coefficient (Std. Err.) | R-Squared | Coefficient (Std. Err.)                                        | R-Squared |
| <b>Full Sample, 559 Schools</b>                               |                         |           |                                                                |           |
| Total expenditures, per pupil                                 | 0.18<br>(0.11)          | 0.008     | -0.08<br>(0.10)                                                | 0.535     |
| Total expenditures, per pupil and cost-adjusted               | 0.18<br>(0.12)          | 0.006     | 0.02<br>(0.11)                                                 | 0.534     |
| Instructional expenditures, per pupil                         | 0.24<br>(0.20)          | 0.004     | -0.27<br>(0.19)                                                | 0.536     |
| Instructional expenditures, per pupil and cost-adjusted       | 0.20<br>(0.21)          | 0.002     | 0.02<br>(0.19)                                                 | 0.534     |
| Salaries for instructional staff, per pupil                   | 0.61<br>(0.31)          | 0.011     | -0.30<br>(0.27)                                                | 0.535     |
| Salaries for instructional staff, per pupil and cost-adjusted | 0.58<br>(0.31)          | 0.008     | 0.08<br>(0.27)                                                 | 0.534     |
| <b>Restricted Sample, 518 Schools</b>                         |                         |           |                                                                |           |
| Total expenditures, per pupil                                 | 0.18<br>(0.11)          | 0.007     | -0.08<br>(0.11)                                                | 0.544     |
| Total expenditures, per pupil and cost-adjusted               | 0.18<br>(0.12)          | 0.005     | 0.01<br>(0.12)                                                 | 0.543     |
| Instructional expenditures, per pupil                         | 0.19<br>(0.21)          | 0.002     | -0.28<br>(0.20)                                                | 0.545     |
| Instructional expenditures, per pupil and cost-adjusted       | 0.15<br>(0.22)          | 0.001     | -0.02<br>(0.21)                                                | 0.543     |
| Salaries for instructional staff, per pupil                   | 0.58<br>(0.33)          | 0.009     | -0.32<br>(0.28)                                                | 0.544     |
| Salaries for instructional staff, per pupil and cost-adjusted | 0.56<br>(0.35)          | 0.007     | 0.07<br>(0.29)                                                 | 0.543     |

Source: See Table 1.

Notes: Expenditure variables are entered in thousands of dollars. Data are weighted by the school mean of the individual-level weight (i.e., the panel weight constructed by the data distributors, *f2pnlwt*, multiplied by an adjustment weight that we created to account for missing data on educational attainment) multiplied by the within-school sample sizes in order to generate the precision weighting that is typical of multilevel models.

**Table S7 (for Comparison with Tables 7 and 8). Metric Coefficients for Expenditure Variables for Separate Between-School Models of 12<sup>th</sup> Grade Math Test Scores, With and Without Adjustments for Family Background, Region, and Urbanicity**

|                                                               | Unadjusted              |           | With Adjustments for Family Background, Region, and Urbanicity |           |
|---------------------------------------------------------------|-------------------------|-----------|----------------------------------------------------------------|-----------|
|                                                               | Coefficient (Std. Err.) | R-Squared | Coefficient (Std. Err.)                                        | R-Squared |
| <b>Full Sample, 559 Schools</b>                               |                         |           |                                                                |           |
| Total expenditures, per pupil                                 | 0.32<br>(0.16)          | 0.010     | -0.12<br>(0.13)                                                | 0.592     |
| Total expenditures, per pupil and cost-adjusted               | 0.25<br>(0.17)          | 0.005     | 0.03<br>(0.16)                                                 | 0.592     |
| Instructional expenditures, per pupil                         | 0.52<br>(0.31)          | 0.008     | -0.11<br>(0.26)                                                | 0.592     |
| Instructional expenditures, per pupil and cost-adjusted       | 0.38<br>(0.30)          | 0.004     | 0.25<br>(0.30)                                                 | 0.592     |
| Salaries for instructional staff, per pupil                   | 1.14<br>(0.47)          | 0.018     | -0.09<br>(0.35)                                                | 0.592     |
| Salaries for instructional staff, per pupil and cost-adjusted | 0.95<br>(0.46)          | 0.010     | 0.44<br>(0.38)                                                 | 0.593     |
| <b>Restricted Sample, 518 Schools</b>                         |                         |           |                                                                |           |
| Total expenditures, per pupil                                 | 0.29<br>(0.17)          | 0.008     | -0.15<br>(0.13)                                                | 0.602     |
| Total expenditures, per pupil and cost-adjusted               | 0.22<br>(0.18)          | 0.003     | -0.02<br>(0.16)                                                | 0.601     |
| Instructional expenditures, per pupil                         | 0.46<br>(0.33)          | 0.006     | -0.16<br>(0.28)                                                | 0.601     |
| Instructional expenditures, per pupil and cost-adjusted       | 0.31<br>(0.33)          | 0.002     | 0.21<br>(0.32)                                                 | 0.602     |
| Salaries for instructional staff, per pupil                   | 1.10<br>(0.51)          | 0.015     | -0.20<br>(0.37)                                                | 0.601     |
| Salaries for instructional staff, per pupil and cost-adjusted | 0.91<br>(0.52)          | 0.008     | 0.37<br>(0.42)                                                 | 0.602     |

Source: See Table 1.

Notes: See Table S7.



**Table S8 (for Comparison with Tables 7 and 8). Metric Coefficients for Expenditure Variables for Separate Between-School Models of On-Time High School Graduation, With and Without Adjustments for Family Background, Region, and Urbanicity**

|                                                               | Unadjusted              |           | With Adjustments for Family Background, Region, and Urbanicity |           |
|---------------------------------------------------------------|-------------------------|-----------|----------------------------------------------------------------|-----------|
|                                                               | Coefficient (Std. Err.) | R-Squared | Coefficient (Std. Err.)                                        | R-Squared |
| <b>Full Sample, 559 Schools</b>                               |                         |           |                                                                |           |
| Total expenditures, per pupil                                 | 0.01<br>(0.003)         | 0.012     | < 0.01<br>(0.002)                                              | 0.258     |
| Total expenditures, per pupil and cost-adjusted               | 0.01<br>(0.003)         | 0.008     | < 0.01<br>(0.003)                                              | 0.259     |
| Instructional expenditures, per pupil                         | 0.01<br>(0.006)         | 0.006     | 0.01<br>(0.005)                                                | 0.257     |
| Instructional expenditures, per pupil and cost-adjusted       | 0.01<br>(0.007)         | 0.003     | 0.01<br>(0.006)                                                | 0.258     |
| Salaries for instructional staff, per pupil                   | 0.02<br>(0.008)         | 0.011     | 0.01<br>(0.008)                                                | 0.257     |
| Salaries for instructional staff, per pupil and cost-adjusted | 0.01<br>(0.010)         | 0.007     | 0.01<br>(0.008)                                                | 0.257     |
| <b>Restricted Sample, 518 Schools</b>                         |                         |           |                                                                |           |
| Total expenditures, per pupil                                 | < 0.01<br>(0.003)       | 0.008     | < 0.01<br>(0.002)                                              | 0.252     |
| Total expenditures, per pupil and cost-adjusted               | < 0.01<br>(0.003)       | 0.005     | < 0.01<br>(0.003)                                              | 0.253     |
| Instructional expenditures, per pupil                         | 0.01<br>(0.006)         | 0.003     | < 0.01<br>(0.006)                                              | 0.252     |
| Instructional expenditures, per pupil and cost-adjusted       | < 0.01<br>(0.007)       | 0.001     | < 0.01<br>(0.006)                                              | 0.252     |
| Salaries for instructional staff, per pupil                   | 0.01<br>(0.009)         | 0.006     | < 0.01<br>(0.008)                                              | 0.251     |
| Salaries for instructional staff, per pupil and cost-adjusted | 0.01<br>(0.011)         | 0.003     | < 0.01<br>(0.009)                                              | 0.252     |

Source: See Table 1.

Notes: See Table 7.

**Table S9 (for Comparison with Tables 7 and 8). Metric Coefficients for Expenditure Variables for Separate Between-School Models of Any Post-Secondary Education, With and Without Adjustments for Family Background, Region, and Urbanicity**

|                                                               | Unadjusted              |           | With Adjustments for Family Background, Region, and Urbanicity |           |
|---------------------------------------------------------------|-------------------------|-----------|----------------------------------------------------------------|-----------|
|                                                               | Coefficient (Std. Err.) | R-Squared | Coefficient (Std. Err.)                                        | R-Squared |
| <b>Full Sample, 559 Schools</b>                               |                         |           |                                                                |           |
| Total expenditures, per pupil                                 | 0.01<br>(0.002)         | 0.045     | 0.01<br>(0.002)                                                | 0.317     |
| Total expenditures, per pupil and cost-adjusted               | 0.01<br>(0.002)         | 0.020     | 0.01<br>(0.003)                                                | 0.313     |
| Instructional expenditures, per pupil                         | 0.02<br>(0.004)         | 0.035     | 0.02<br>(0.005)                                                | 0.315     |
| Instructional expenditures, per pupil and cost-adjusted       | 0.01<br>(0.005)         | 0.013     | 0.01<br>(0.005)                                                | 0.310     |
| Salaries for instructional staff, per pupil                   | 0.03<br>(0.006)         | 0.042     | 0.02<br>(0.008)                                                | 0.314     |
| Salaries for instructional staff, per pupil and cost-adjusted | 0.02<br>(0.007)         | 0.016     | 0.01<br>(0.008)                                                | 0.309     |
| <b>Restricted Sample, 518 Schools</b>                         |                         |           |                                                                |           |
| Total expenditures, per pupil                                 | 0.01<br>(0.002)         | 0.049     | 0.01<br>(0.002)                                                | 0.329     |
| Total expenditures, per pupil and cost-adjusted               | 0.01<br>(0.003)         | 0.020     | 0.01<br>(0.003)                                                | 0.323     |
| Instructional expenditures, per pupil                         | 0.02<br>(0.004)         | 0.037     | 0.02<br>(0.006)                                                | 0.328     |
| Instructional expenditures, per pupil and cost-adjusted       | 0.01<br>(0.005)         | 0.012     | 0.01<br>(0.006)                                                | 0.321     |
| Salaries for instructional staff, per pupil                   | 0.03<br>(0.007)         | 0.045     | 0.02<br>(0.008)                                                | 0.325     |
| Salaries for instructional staff, per pupil and cost-adjusted | 0.02<br>(0.008)         | 0.015     | 0.02<br>(0.009)                                                | 0.319     |

Source: See Table 1.

Notes: See Table 7.

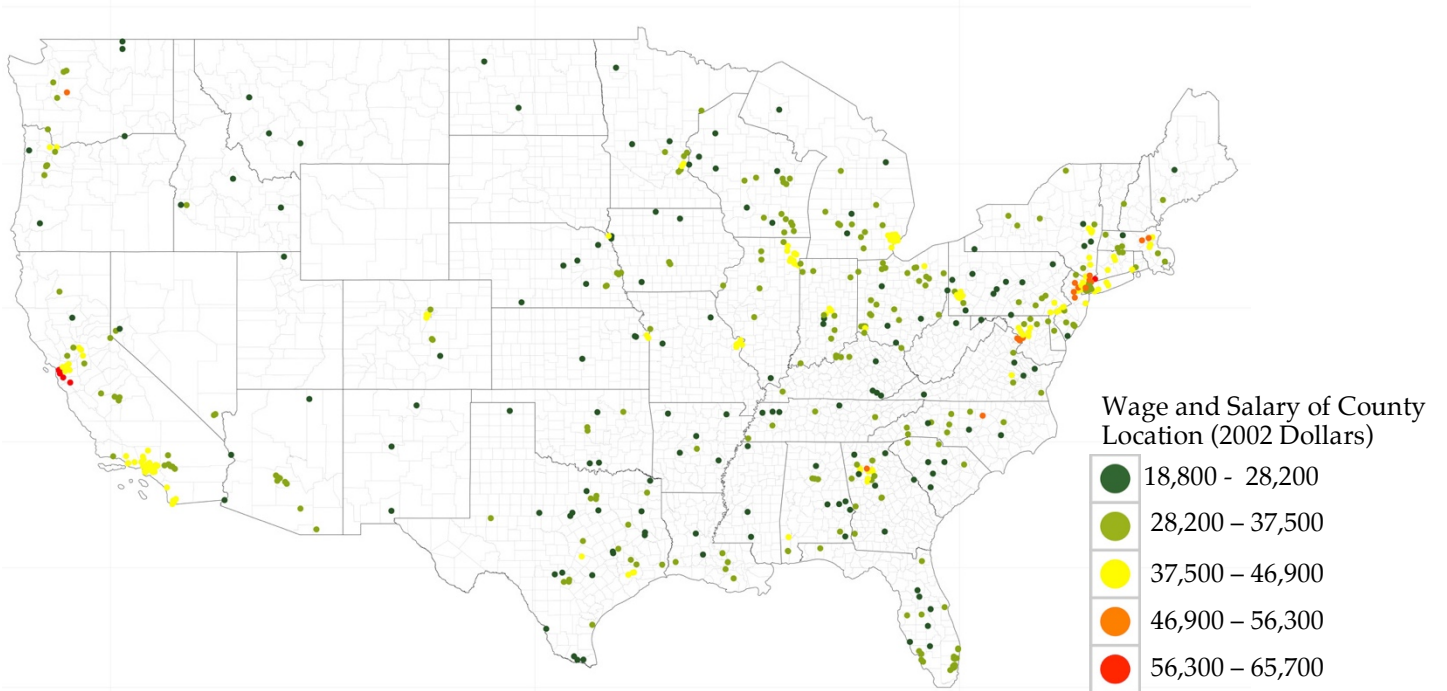

**Figure S1. Average Annual Wage/Salary Per Job in the County, Attached to and Displayed for Hypothetical ELS High Schools Based on Their County Locations**

*Source:* Bureau of Economic Analysis, Regional Economic Accounts, Table CA34, 2002, matched to high schools sampled proportional to size from the 2001-02 Common Core of Data School Universe File.

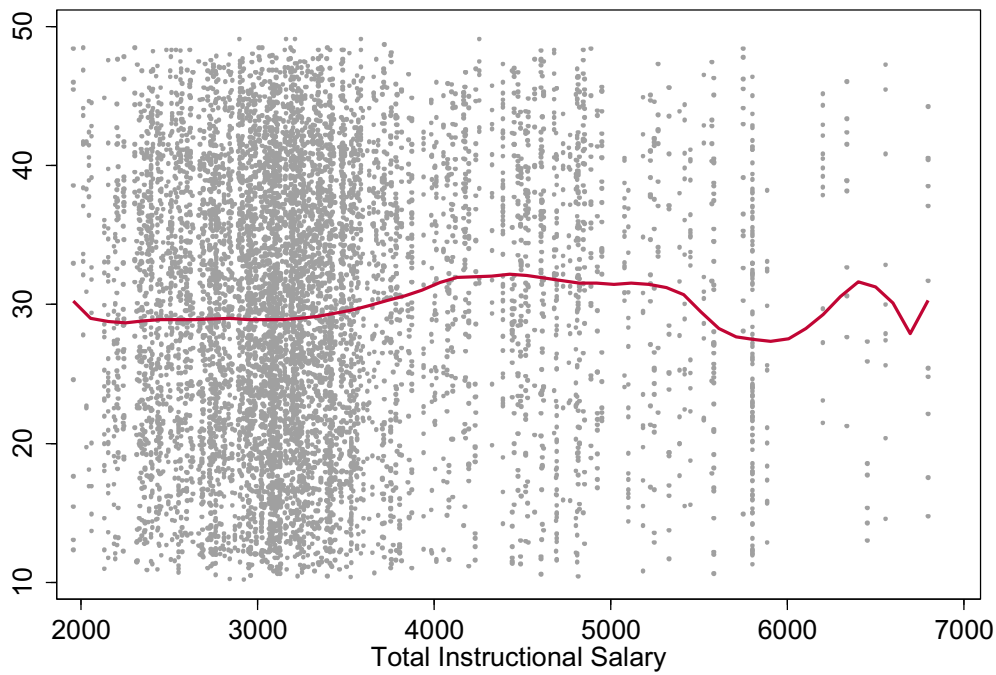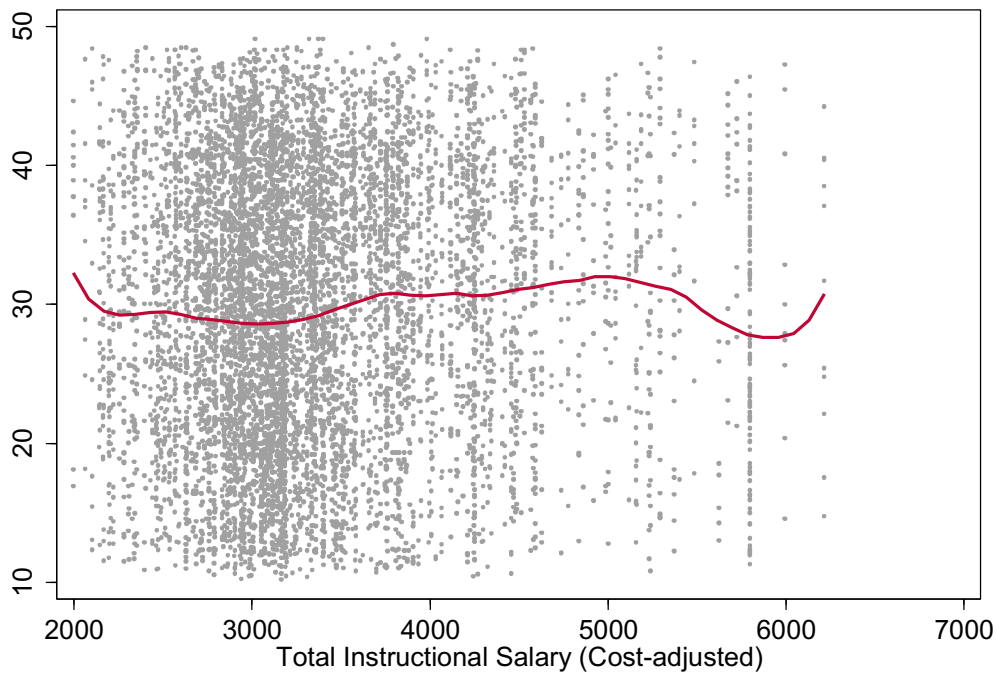

**Figure S2. Tenth Grade Reading Test Scores by Per-Pupil Salaries for Instructional Staff, With and Without Cost Adjustment**

Source: ELS 2002 and Common Core of Data, 2001-2004.

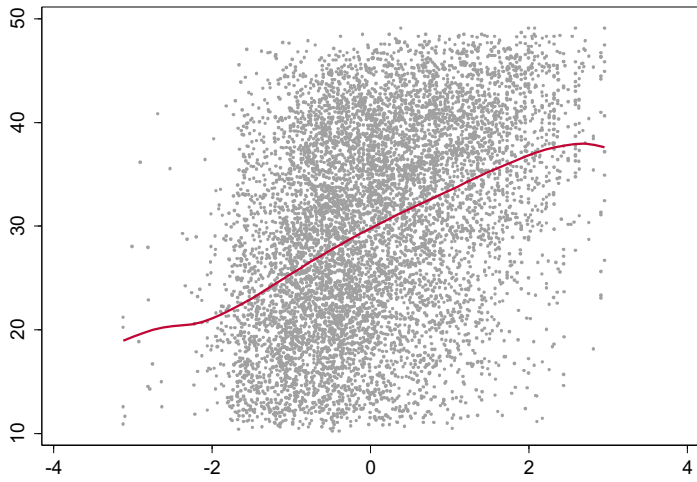

Individual Test Scores by Individual Socioeconomic Status

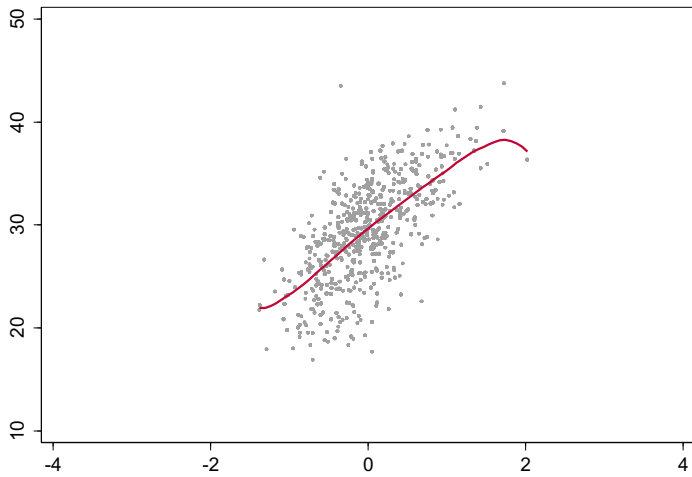

School Mean Test Scores by School Mean Socioeconomic Status

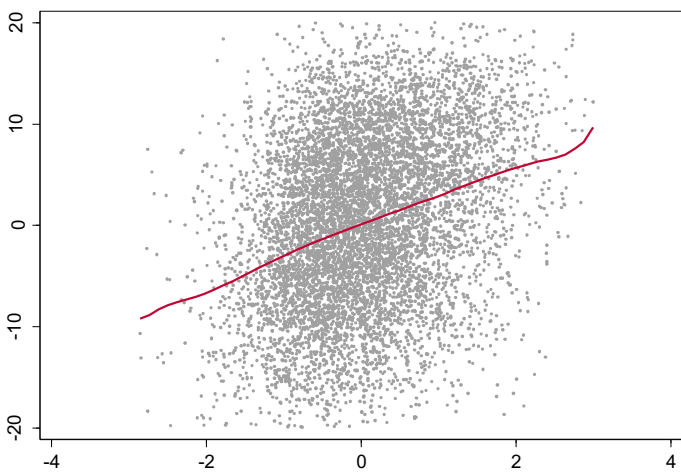

Individual Test Scores by Socioeconomic Status, Plotted as Individual Deviations from School Means

**Figure S3. Three Depictions of the Relationship Between Tenth Grade Reading Test Scores and Socioeconomic Status**  
*Source:* ELS 2002 and Common Core of Data, 2001-2004.

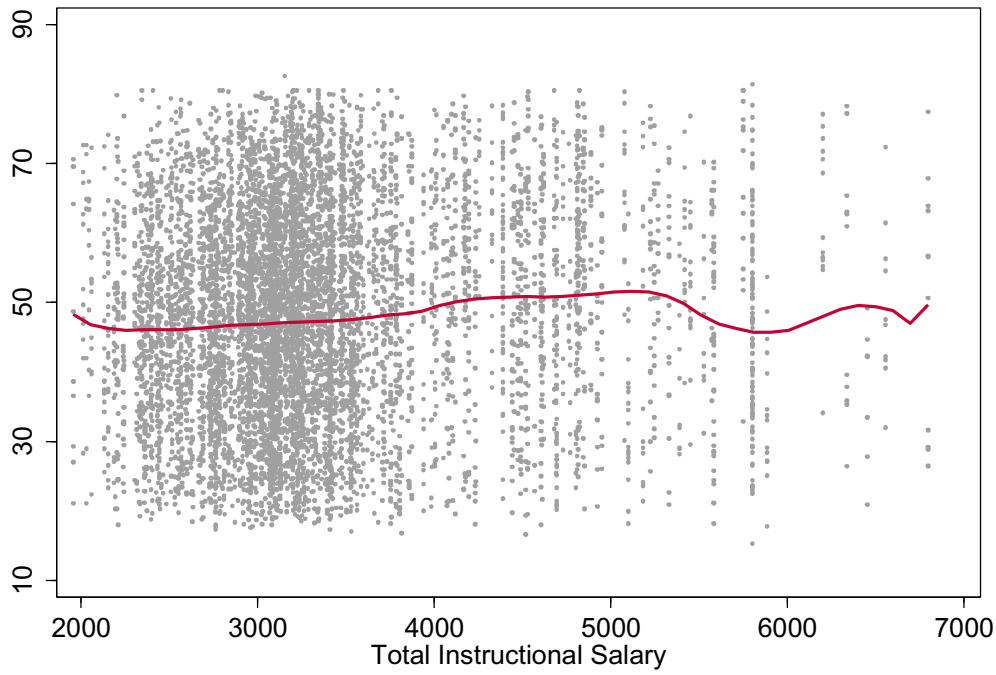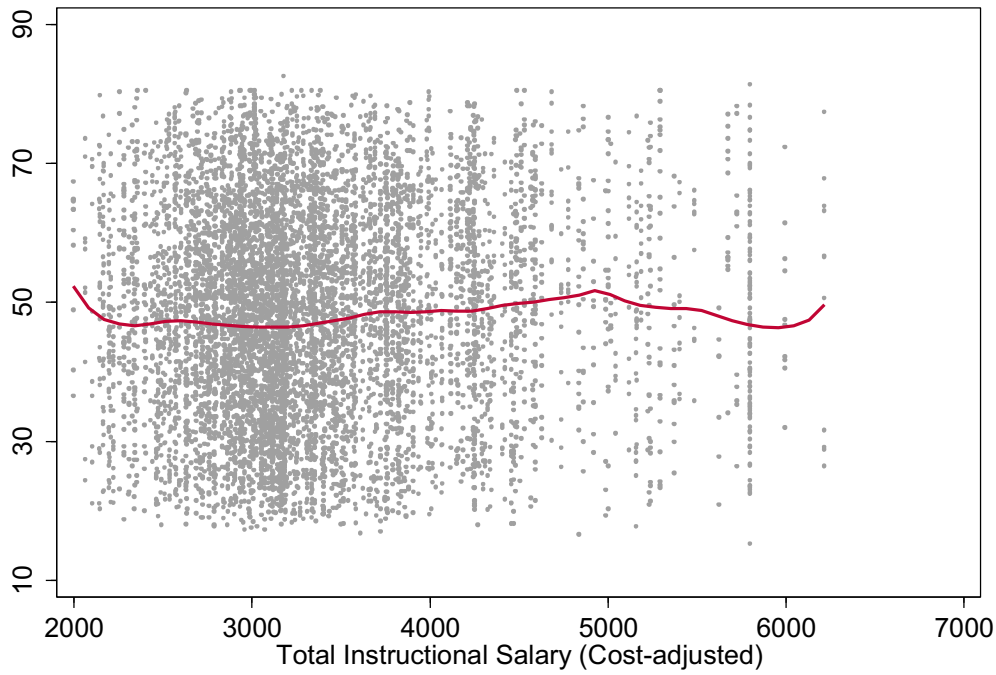

**Figure S4. Twelfth Grade Math Test Scores by Per-Pupil Salaries for Instructional Staff, With and Without Cost Adjustment**  
*Source:* ELS 2004 and Common Core of Data, 2001-2004.

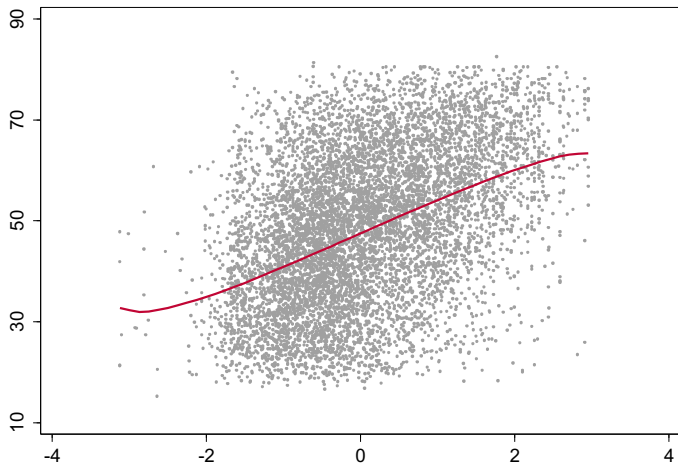

Individual Test Scores by Individual Socioeconomic Status

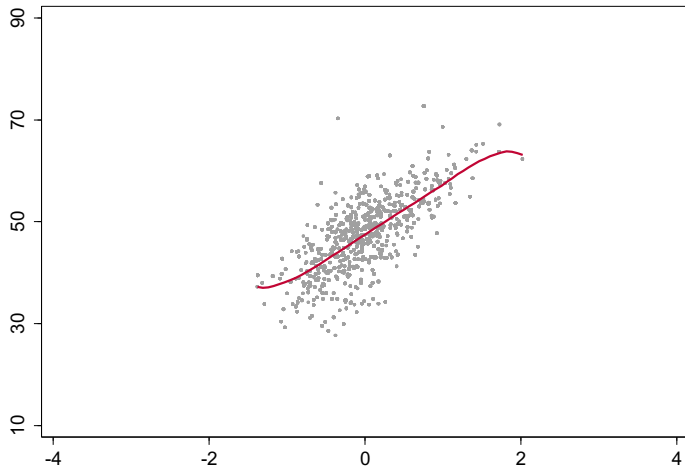

School Mean Test Scores by School Mean Socioeconomic Status

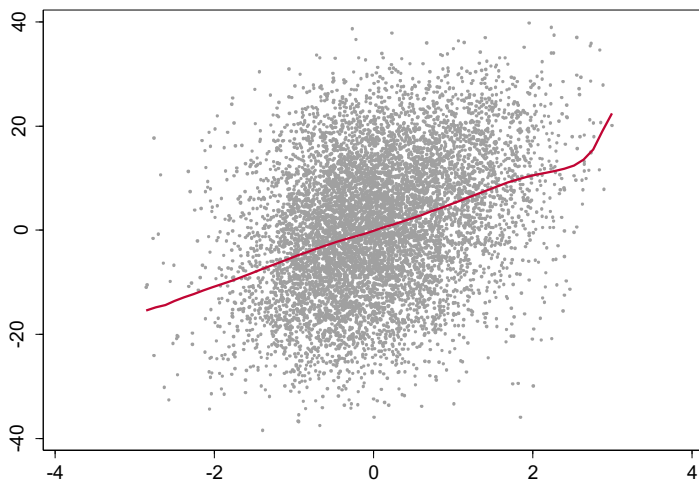

Individual Test Scores by Socioeconomic Status, Plotted as Individual Deviations from School Means

**Figure S5. Three Depictions of the Relationship Between Twelfth Grade Math Test Scores and Socioeconomic Status**  
 Source: ELS 2004 and Common Core of Data, 2001-2004.

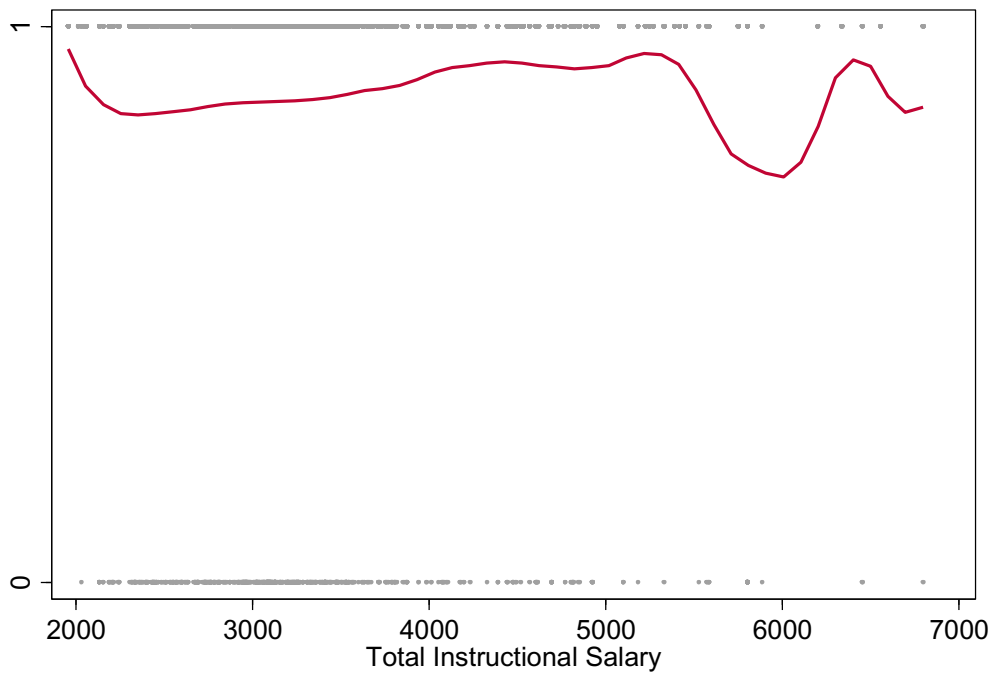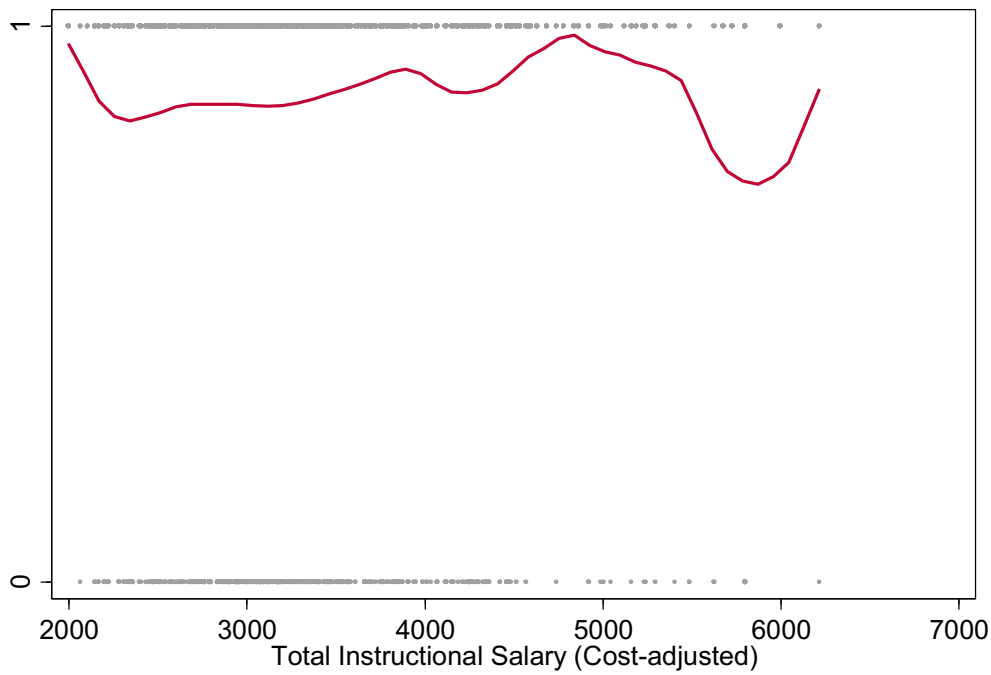

**Figure S6. On-Time High School Graduation by Per-Pupil Salaries for Instructional Staff, With and Without Cost Adjustment**

Source: ELS, 2002-2006, and Common Core of Data, 2001-2004.



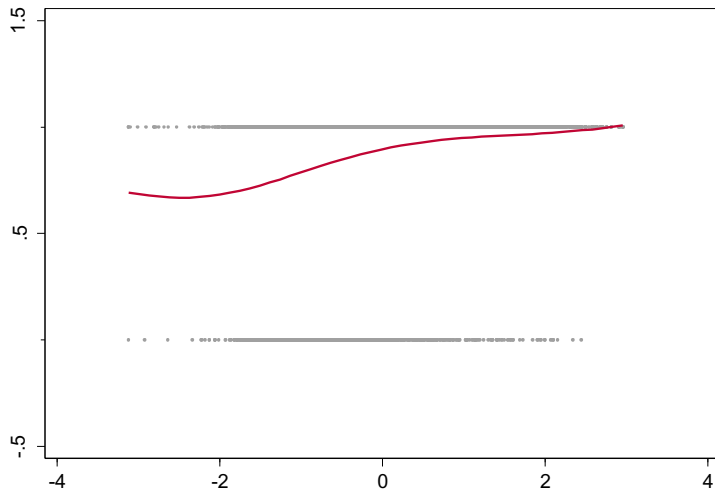

High School Graduation by Individual Socioeconomic Status

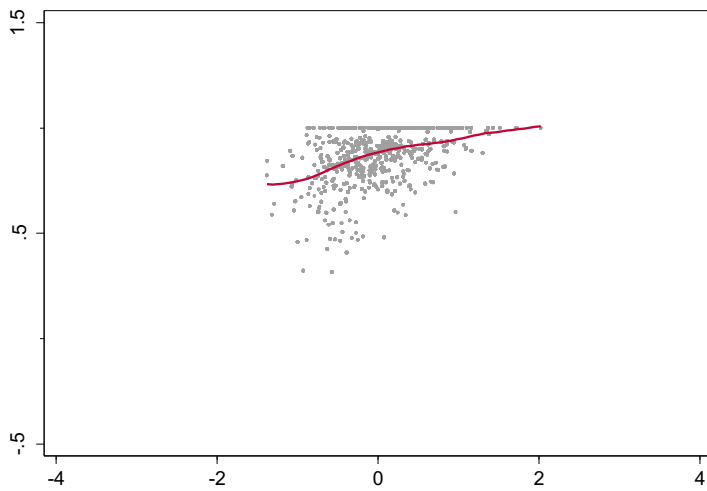

School High School Graduation Rate by School Mean Socioeconomic Status

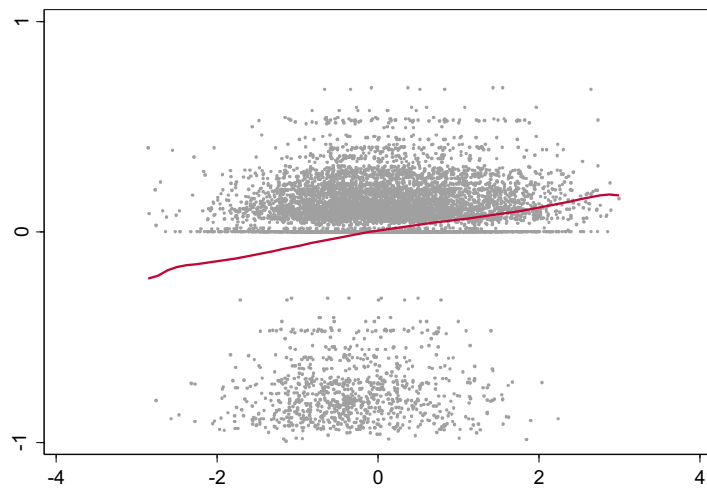

Individual Deviations from School Rates/Means

**Figure S7. Three Depictions of the Relationship Between On-Time High School Graduation and Socioeconomic Status**  
*Source:* ELS, 2002-2006, and Common Core of Data, 2001-2004.

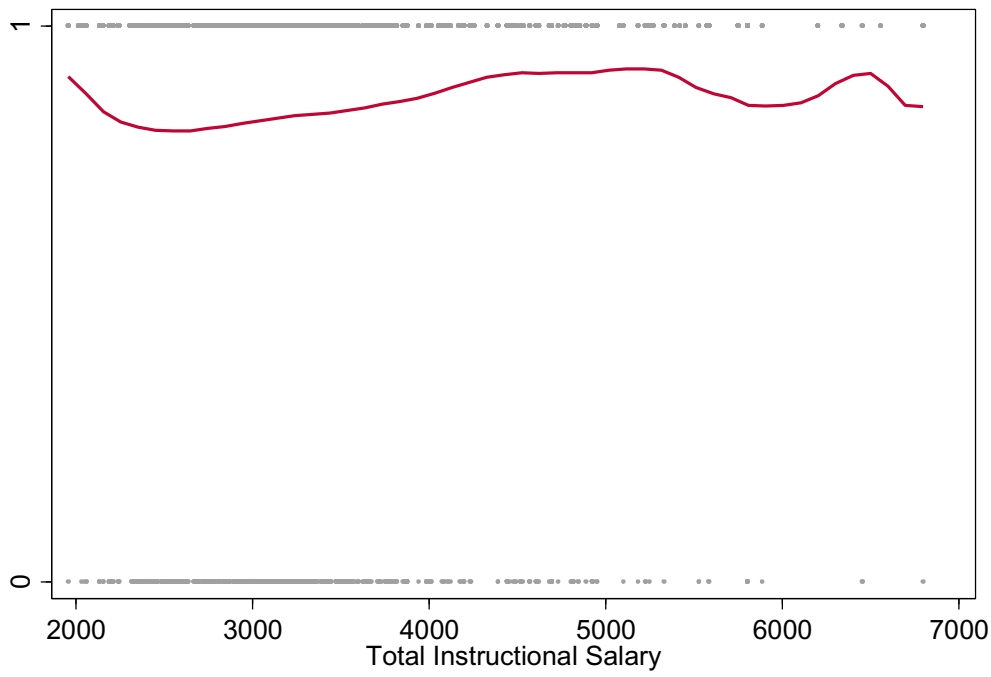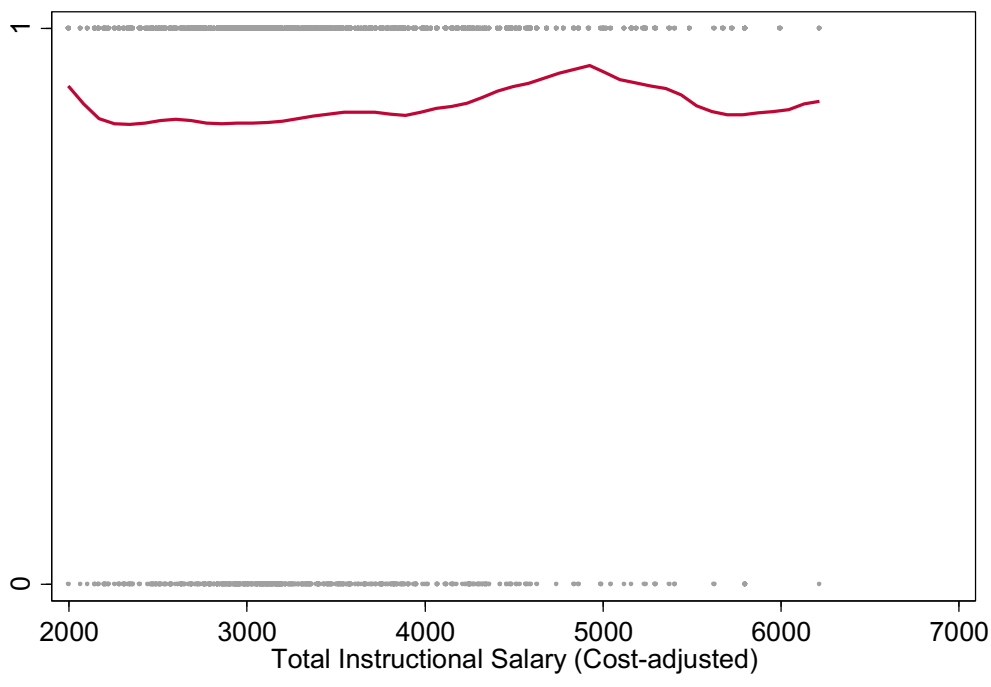

**Figure S8. Any Post-Secondary Education by Per-Pupil Salaries for Instructional Staff, With and Without Cost Adjustment**  
 Source: ELS 2012 and Common Core of Data, 2001-2004.

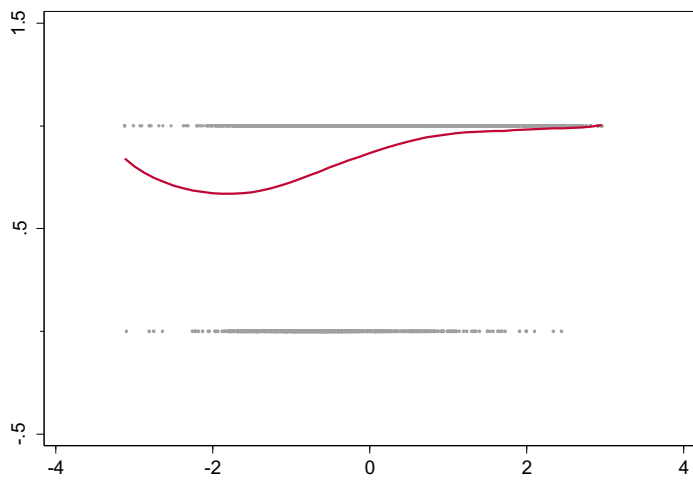

Post-Secondary Attendance by Individual Socioeconomic Status

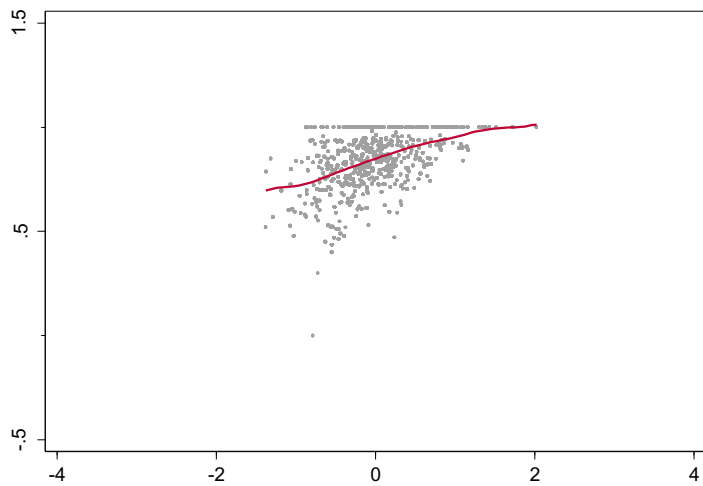

School Post-Secondary Attendance Rate by School Mean Socioeconomic Status

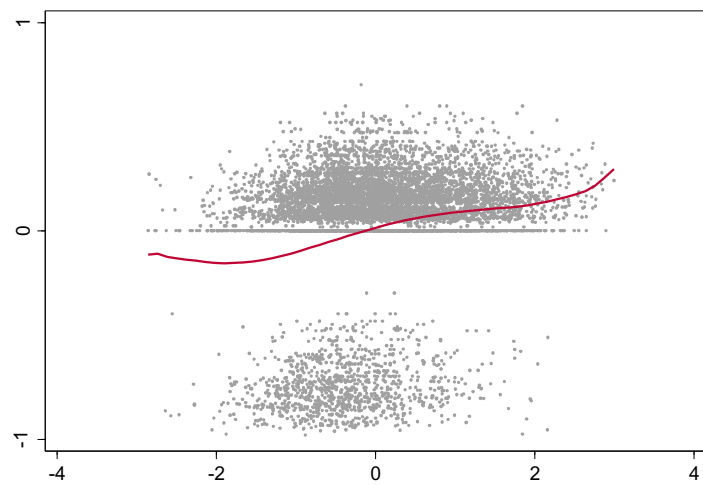

Individual Deviations from School Rates/Means

**Figure S9. Three Depictions of the Relationship Between Any Post-Secondary Education and Socioeconomic Status**  
*Source:* ELS 2012 and Common Core of Data, 2001-2004.

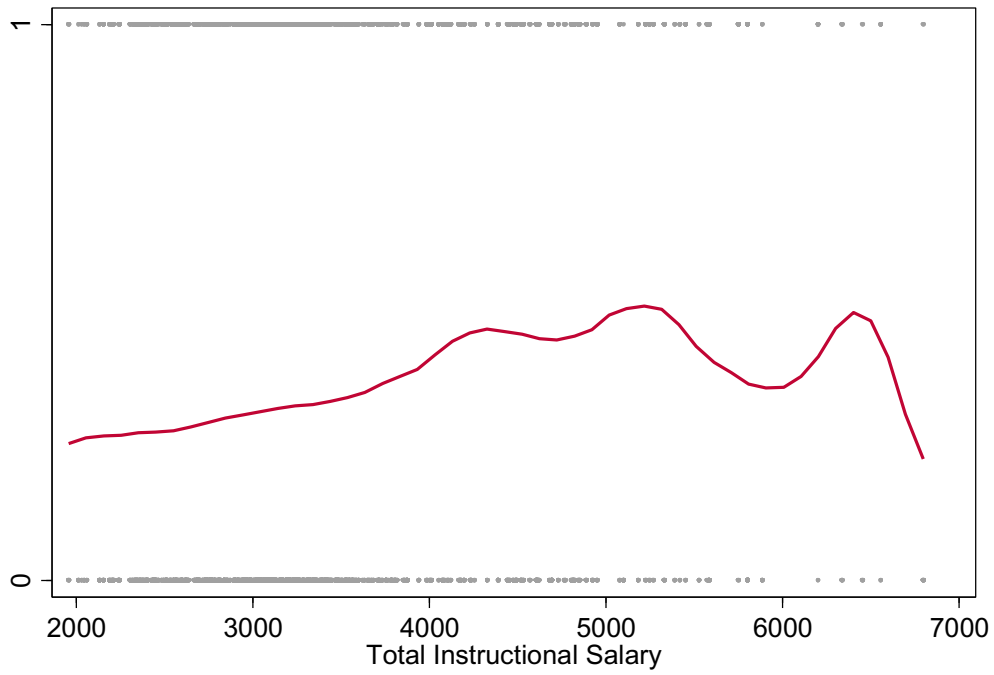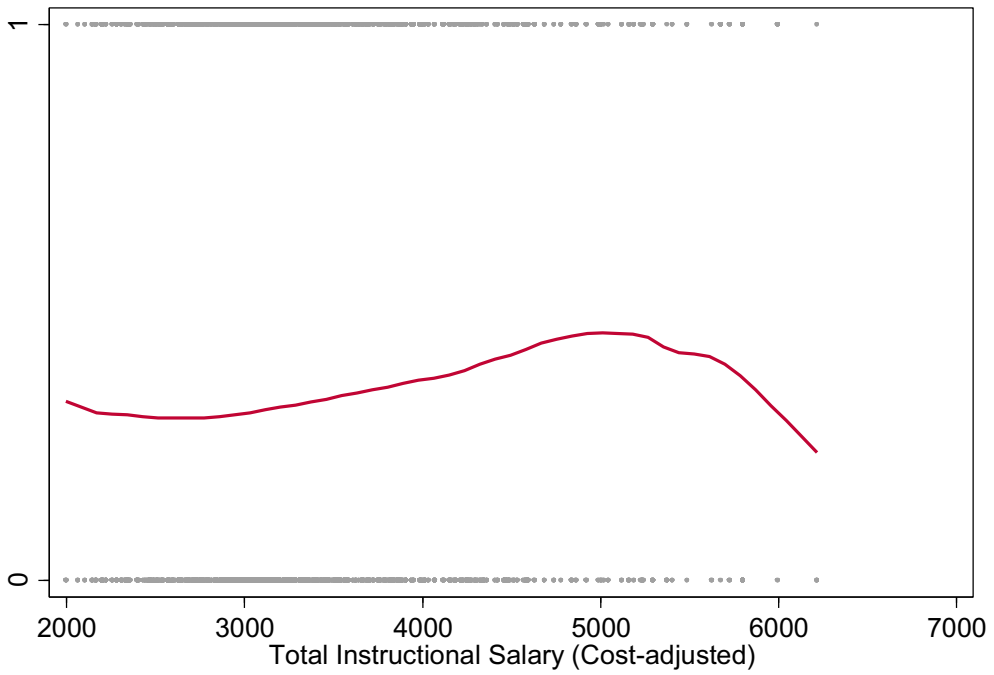

**Figure S10. Bachelor's Degree Attainment by Per-Pupil Salaries for Instructional Staff, With and Without Cost Adjustment**  
 Source: ELS 2012 and Common Core of Data, 2001-2004.

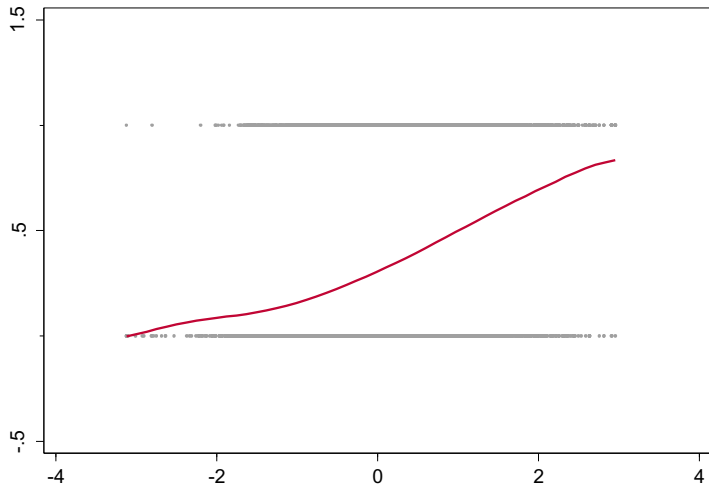

Bachelor's Degree Attainment by Individual Socioeconomic Status

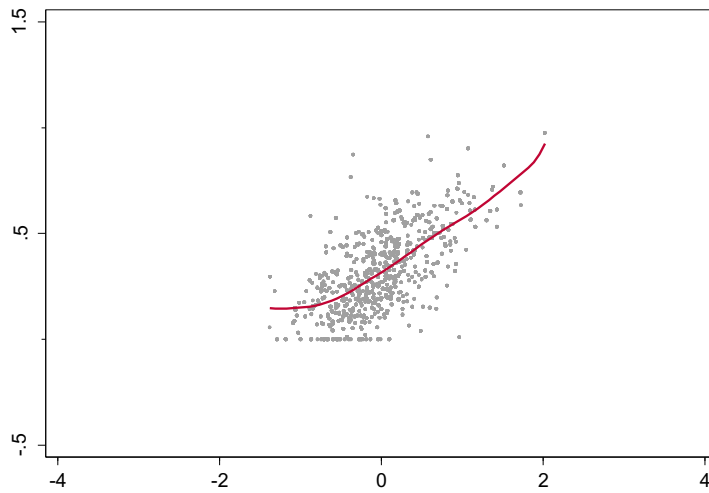

School Bachelor's Degree Attainment Rate by School Mean Socioeconomic Status

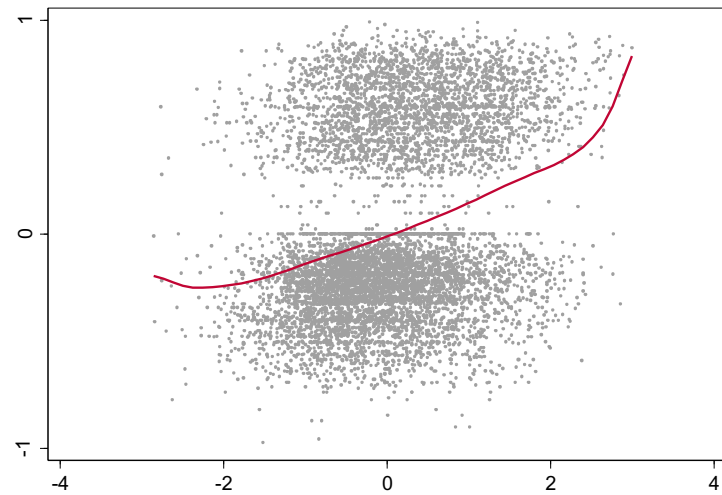

Individual Deviations from School Rates/Means

**Figure S11. Three Depictions of the Relationship Between Bachelor's Degree Attainment and Socioeconomic Status**  
 Source: ELS 2012 and Common Core of Data, 2001-2004.
